# Supplementary material for: Rational design of anti-Kasha photoemission from a biazulene core embedded in an antiaromatic/aromatic hybrid
Source: Royal Society of Chemistry journal article supplement (doi:10.1039/d3sc00405h), 2023-01-01
Supplement: d3sc00405h1.pdf [file d3sc00405h1.pdf]

## Supporting Information for:

### **Rational design of anti-Kasha photoemission from a biazulene core embedded in an antiaromatic/aromatic hybrid**

Aitor Diaz-Andres<sup>¶</sup>, Jose Marín-Beloqui<sup>‡</sup>, Junting Wang<sup>†</sup>, Junzhi Liu<sup>†</sup>, Juan Casado<sup>‡</sup>,  
David Casanova<sup>¶, #</sup>

<sup>¶</sup>Donostia International Physics Center (DIPC), 20018 Donostia, Euskadi, Spain

<sup>†</sup>Department of Chemistry and State Key Laboratory of Synthetic Chemistry, The University of Hong Kong, Pokfulam Road, Hong Kong, China

<sup>‡</sup>Department of Physical Chemistry, University of Malaga Campus de Teatins s/n, 229071 Malaga, Spain

<sup>¶</sup>Donostia International Physics Center (DIPC), 20018 Donostia, Euskadi, Spain

<sup>#</sup>IKERBASQUE – Basque Foundation for Science, 48009 Bilbao, Euskadi, Spain

## CONTENTS

### **1. Electronic structure calculations**

Hückel model

Molecular orbitals and energies of biA1 homologues bridged with hexagons

Molecular orbitals at the rCAM-B3LYP level

Vertical excitations

Nucleus-independent chemical shift (NICS)

### **2. Transient absorption and fluorescence measurements**

### **3. Optimized coordinates**

## 1. Electronic structure calculations

### Hückel model

Hückel orbital energies were obtained using the orbital parameters  $\alpha$  (the energy of an electron in a p-orbital) and  $\beta$  (the interaction energy between two orbitals) from the reported literature [*J. Org. Chem.* **45**, 4801-4802 (1980)].

### Molecular orbitals and energies of biA1 homologues bridged with hexagons

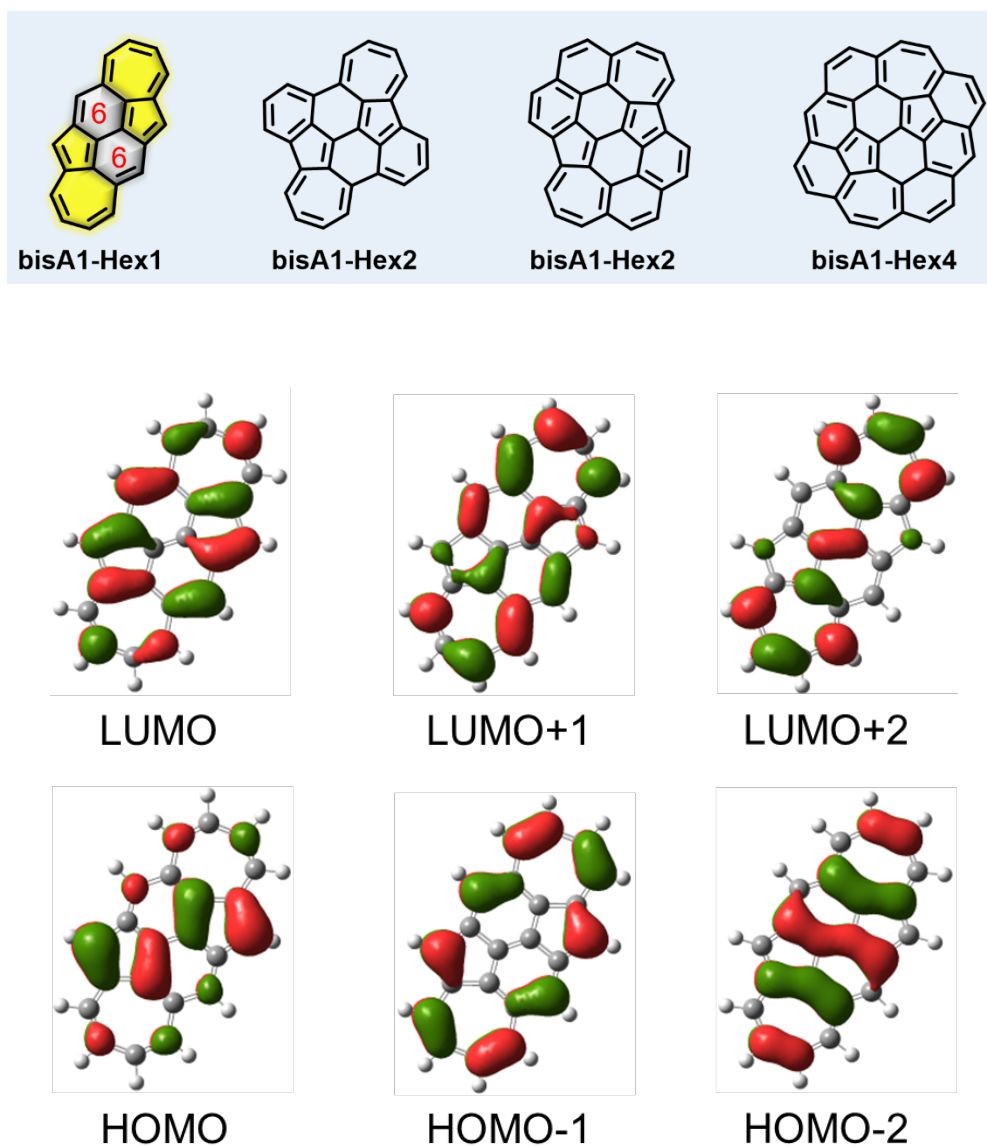

**Figure S1.** Frontier molecular orbitals of **biA1-Hex1** computed at the B3LYP/6-311G(d,p) level.

**Table S1.** Vertical excitations ( $\Delta E$  in eV), oscillation strengths ( $f$ ), orbital composition and transition dipole moments ( $\mu$  in a.u.) of low-lying states of **biA1-Hex1** at the Franck-Condon region computed at the B3LYP/6-311G(d,p) level. ( $H_0$ ,  $H_1$  and  $H_2$  present HOMO, HOMO+1, HOMO+2 orbitals, respectively.  $L_0$ ,  $L_1$ , and  $L_2$  are corresponding to LUMO, LUMO+1, LUMO+2 orbitals, respectively).

| State                | $\Delta E$ | $f$        | Composition                                                                                 | $\mu$                    |
|----------------------|------------|------------|---------------------------------------------------------------------------------------------|--------------------------|
| <b>S<sub>1</sub></b> | 1.7329     | 0.000<br>0 | $H_0 \rightarrow L_0$ (89%);<br>$H_0 \rightarrow L_1$ (11%)                                 | 0.00 X; 0.00 Y; 0.00 Z   |
| <b>S<sub>2</sub></b> | 2.0538     | 0.000<br>0 | $H_0 \rightarrow L_0$ (11%);<br>$H_0 \rightarrow L_1$ (89%)                                 | 0.00 X; 0.00 Y; 0.00 Z   |
| <b>S<sub>3</sub></b> | 2.5719     | 0.055<br>6 | $H_1 \rightarrow L_0$ (62%);<br>$H_0 \rightarrow L_2$ (25%);<br>$H_1 \rightarrow L_1$ (7%)  | 0.90 X; -0.26 Y; 0.00 Z  |
| <b>S<sub>4</sub></b> | 2.8320     | 0.061<br>2 | $H_1 \rightarrow L_1$ (74%);<br>$H_1 \rightarrow L_0$ (17%);<br>$H_2 \rightarrow L_0$ (5%)  | -0.31 X; -0.89 Y; 0.00 Z |
| <b>S<sub>5</sub></b> | 3.0602     | 0.080<br>1 | $H_0 \rightarrow L_2$ (61%);<br>$H_2 \rightarrow L_1$ (12%);<br>$H_0 \rightarrow L_0$ (12%) | -0.96 X; 0.38 Y; 0.00 Z  |

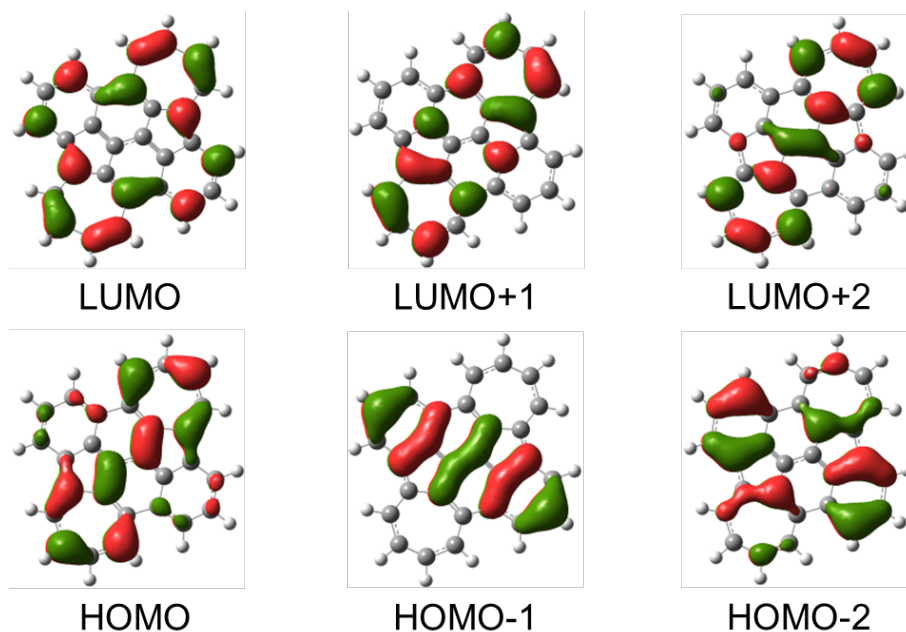

**Figure S2.** Frontier molecular orbitals of **biA1-Hex2** computed at the B3LYP/6-311G(d,p) level.

**Table S2.** Vertical excitations ( $\Delta E$  in eV), oscillation strengths ( $f$ ), orbital composition and transition dipole moments ( $\mu$  in a.u.) of low-lying states of **biA1-Hex2** at the Franck-Condon region computed at the B3LYP/6-311G(d,p) level. ( $H_0$ ,  $H_1$ ,  $H_2$  and  $H_4$  present HOMO, HOMO+1, HOMO+2, HOMO+4 orbitals, respectively.  $L_0$ ,  $L_1$ ,  $L_2$  and  $L_3$  are corresponding to LUMO, LUMO+1, LUMO+2, LUMO+3 orbitals, respectively).

| State                | $\Delta E$ | $f$    | Composition                                                                               | $\mu$                    |
|----------------------|------------|--------|-------------------------------------------------------------------------------------------|--------------------------|
| <b>S<sub>1</sub></b> | 0.9602     | 0.0252 | $H_0 \rightarrow L_0$ (95%);<br>$H_0 \rightarrow L_2$ (5%)                                | 0.91 X; 0.49 Y; 0.00 Z   |
| <b>S<sub>2</sub></b> | 1.3144     | 0.0000 | $H_0 \rightarrow L_1$                                                                     | 0.00 X; 0.00 Y; 0.00 Z   |
| <b>S<sub>3</sub></b> | 2.3807     | 0.3152 | $H_0 \rightarrow L_2$ (87%);<br>$H_2 \rightarrow L_0$ (6%);<br>$H_0 \rightarrow L_0$ (5%) | -2.29 X; 0.43 Y; 0.00 Z  |
| <b>S<sub>4</sub></b> | 2.6470     | 0.0000 | $H_1 \rightarrow L_0$ (95%);<br>$H_0 \rightarrow L_3$ (5%);                               | -0.00 X; -0.00 Y; 0.00 Z |
| <b>S<sub>5</sub></b> | 2.8552     | 0.0000 | $H_0 \rightarrow L_3$ (91%);<br>$H_1 \rightarrow L_0$ (4%);<br>$H_4 \rightarrow L_0$ (4%) | -0.00 X; 0.00 Y; 0.00 Z  |

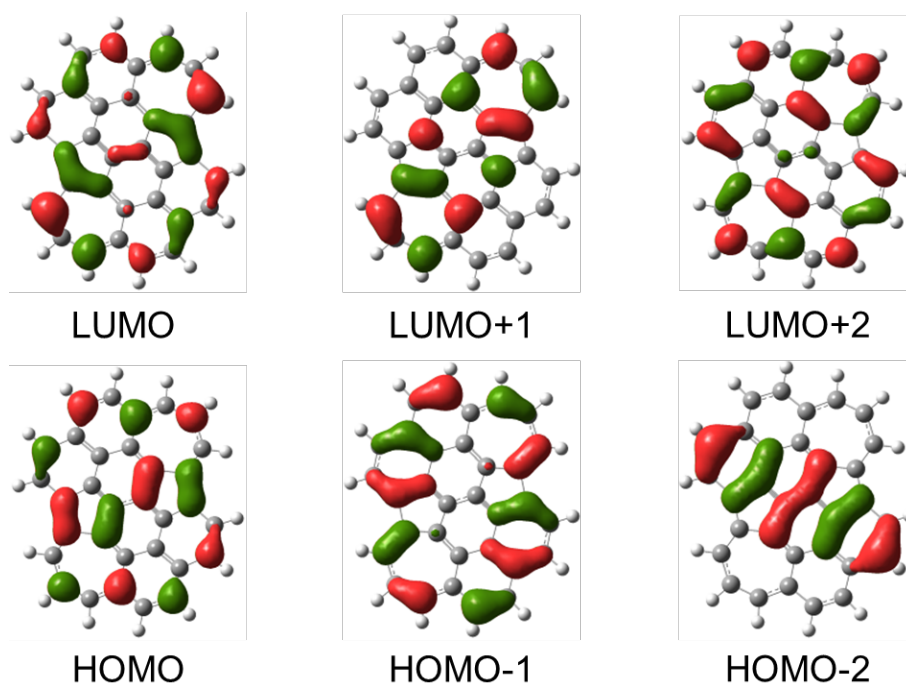

**Figure S3.** Frontier molecular orbitals of **biA1-Hex3** computed at the B3LYP/6-311G(d,p) level.

**Table S3.** Vertical excitations ( $\Delta E$  in eV), oscillation strengths ( $f$ ), orbital composition and transition dipole moments ( $\mu$  in a.u.) of low-lying states of **biA1-Hex3** at the Franck-Condon region computed at the B3LYP/6-311G(d,p) level. ( $H_0$ ,  $H_1$ ,  $H_2$  and  $H_3$  present HOMO, HOMO+1, HOMO+2, HOMO+3 orbitals, respectively.  $L_0$ ,  $L_1$  and  $L_2$  are corresponding to LUMO, LUMO+1, LUMO+2 orbitals, respectively.)

| State | $\Delta E$ | $f$    | Composition                                                                              | $\mu$                    |
|-------|------------|--------|------------------------------------------------------------------------------------------|--------------------------|
| $S_1$ | 1.2433     | 0.0182 | $H_0 \rightarrow L_0$ (97%)<br>$H_0 \rightarrow L_2$ (3%)                                | 0.34 X; -0.70 Y; 0.00 Z  |
| $S_2$ | 1.5663     | 0.0000 | $H_0 \rightarrow L_1$                                                                    | 0.00 X; 0.00 Y; 0.00 Z   |
| $S_3$ | 2.1071     | 0.1366 | $H_0 \rightarrow L_2$ (79%)<br>$H_1 \rightarrow L_0$ (19%)<br>$H_0 \rightarrow L_0$ (2%) | -1.63 X; 0.05 Y; 0.00 Z  |
| $S_4$ | 2.8419     | 0.0000 | $H_2 \rightarrow L_0$ (%)                                                                | 0.00 X; 0.00 Y; 0.00 Z   |
| $S_5$ | 2.9415     | 0.0000 | $H_1 \rightarrow L_0$ (74%)<br>$H_0 \rightarrow L_2$ (14%)<br>$H_3 \rightarrow L_1$ (3%) | -2.55 X; -0.56 Y; 0.00 Z |

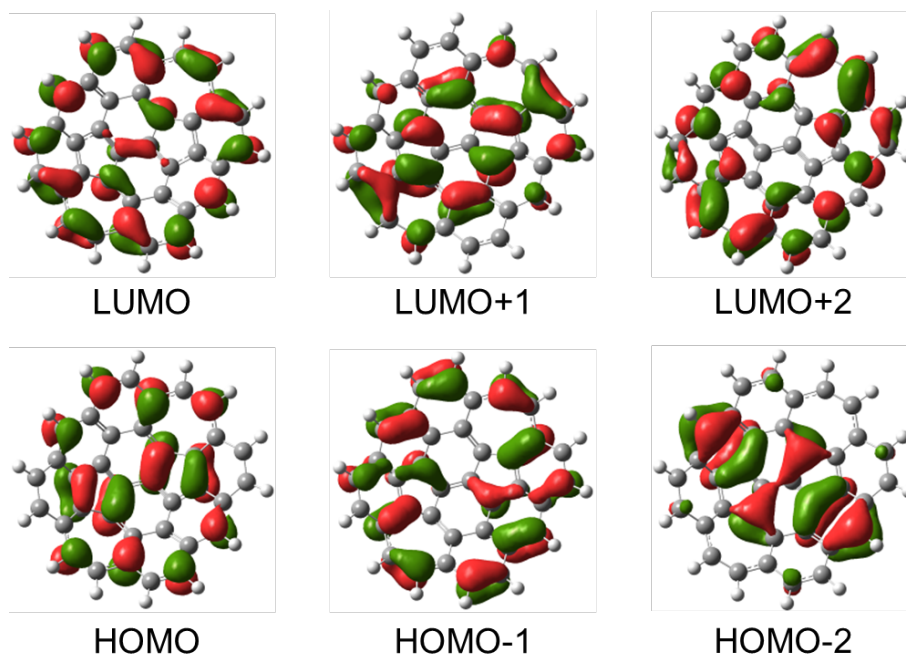

**Figure S4.** Frontier molecular orbitals of **biA1-Hex4** computed at the B3LYP/6-311G(d,p) level.

**Table S4.** Vertical excitations ( $\Delta E$  in eV), oscillation strengths ( $f$ ), orbital composition and transition dipole moments ( $\mu$  in a.u.) of low-lying states of **biA1-Hex3** at the Franck-Condon region computed at the B3LYP/6-311G(d,p) level. ( $H_0$ ,  $H_1$ ,  $H_2$  and  $H_3$  present HOMO, HOMO+1, HOMO+2, HOMO+3 orbitals, respectively.  $L_0$ ,  $L_1$  and  $L_2$  are corresponding to LUMO, LUMO+1, LUMO+2 orbitals, respectively).

| State                | $\Delta E$ | $f$    | Composition                 | $\mu$                    |
|----------------------|------------|--------|-----------------------------|--------------------------|
| <b>S<sub>1</sub></b> | 1.2913     | 0.0003 | $H_0 \rightarrow L_1$       | 0.00 X; 0.00 Y; 0.09 Z   |
| <b>S<sub>2</sub></b> | 1.5532     | 0.0780 | $H_0 \rightarrow L_0$ (88%) | -0.58 X; 1.31 Y; 0.00 Z  |
|                      |            |        | $H_0 \rightarrow L_2$ (12%) |                          |
| <b>S<sub>3</sub></b> | 1.9579     | 0.0567 | $H_0 \rightarrow L_2$ (86%) | -0.85 X; 0.68 Y; 0.00 Z  |
|                      |            |        | $H_0 \rightarrow L_0$ (10%) |                          |
|                      |            |        | $H_0 \rightarrow L_0$ (3%)  |                          |
| <b>S<sub>4</sub></b> | 2.6643     | 0.0028 | $H_1 \rightarrow L_1$ (98%) | 0.00 X; 0.00 Y; -0.21 Z  |
|                      |            |        | $H_3 \rightarrow L_1$ (2%)  |                          |
| <b>S<sub>5</sub></b> | 2.6817     | 0.1687 | $H_1 \rightarrow L_0$ (92%) | -1.48 X; -0.62 Y; 0.00 Z |
|                      |            |        | $H_3 \rightarrow L_2$ (5%)  |                          |
|                      |            |        | $H_0 \rightarrow L_2$ (2%)  |                          |

**Molecular orbitals at the rCAM-B3LYP level**

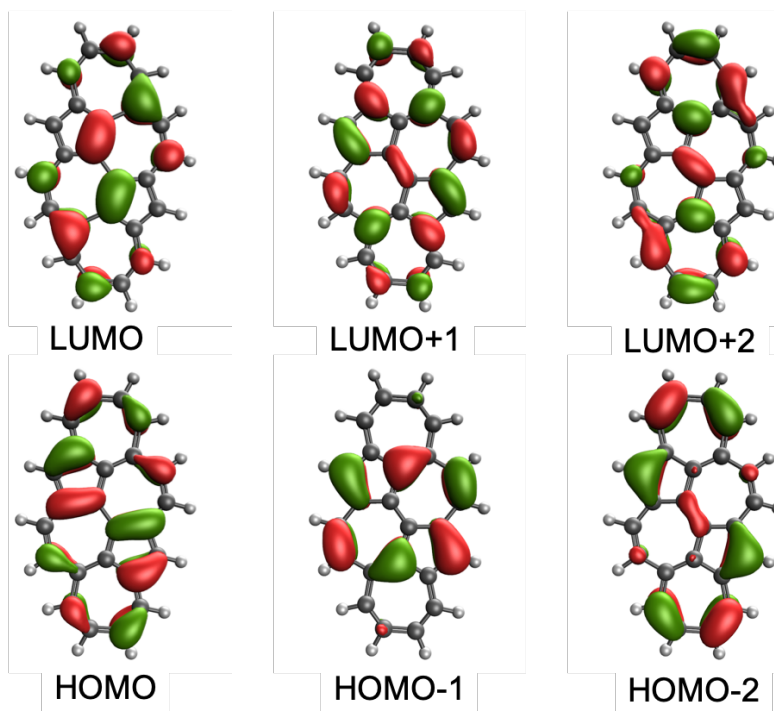

**Figure S5.** Frontier molecular orbitals of **biA1a** computed at the rCAM-B3LYP/cc-pVTZ level.

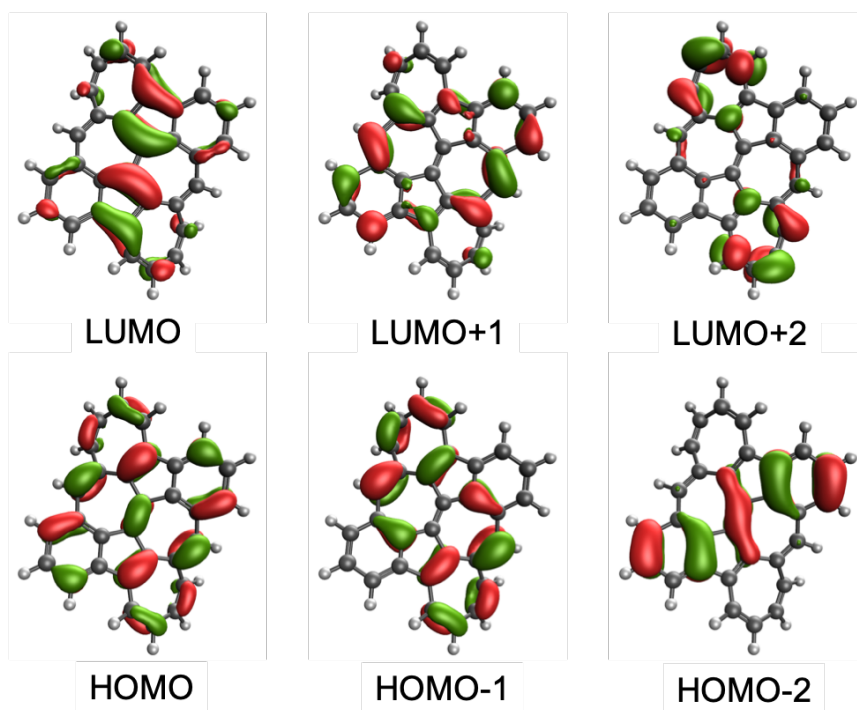

**Figure S6.** Frontier molecular orbitals of **biA1b** computed at the rCAM-B3LYP/cc-pVTZ level.

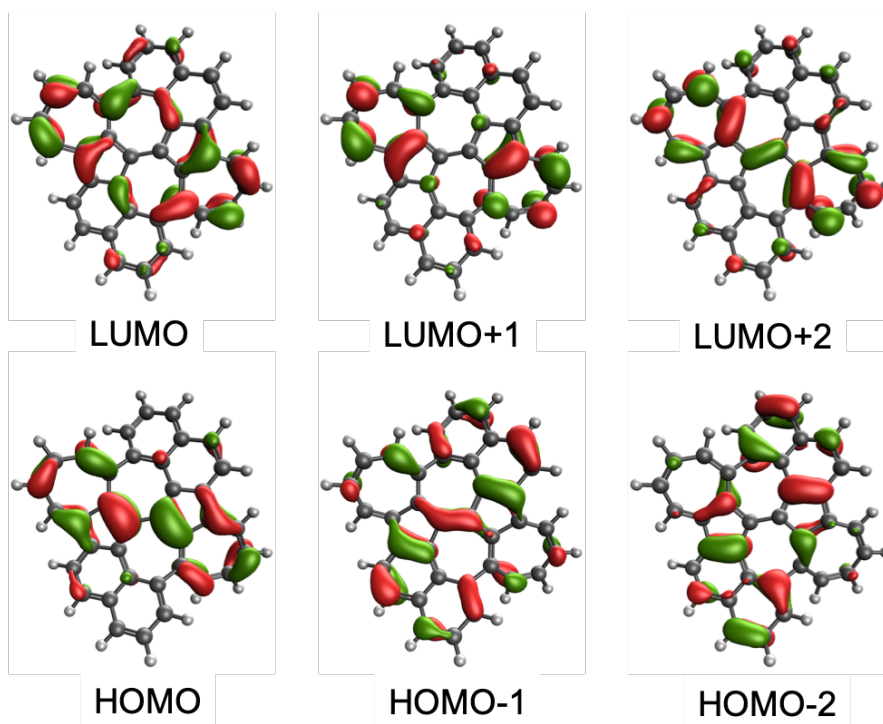

**Figure S7.** Frontier molecular orbitals of **biA1c** computed at the rCAM-B3LYP/cc-pVTZ level.

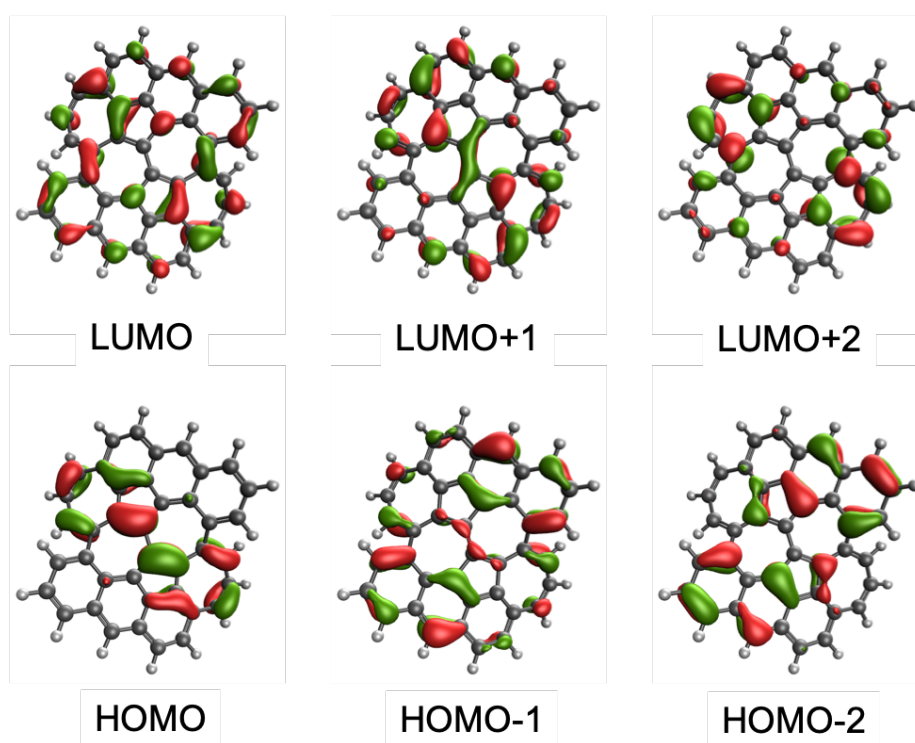

**Figure S8.** Frontier molecular orbitals of **biA1d** computed at the rCAM-B3LYP/cc-pVTZ level.



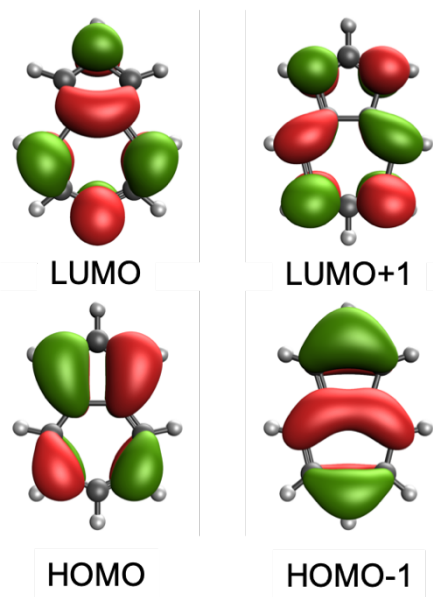

**Figure S9.** Frontier molecular orbitals of azulene at the rCAM-B3LYP/cc-pVTZ level.

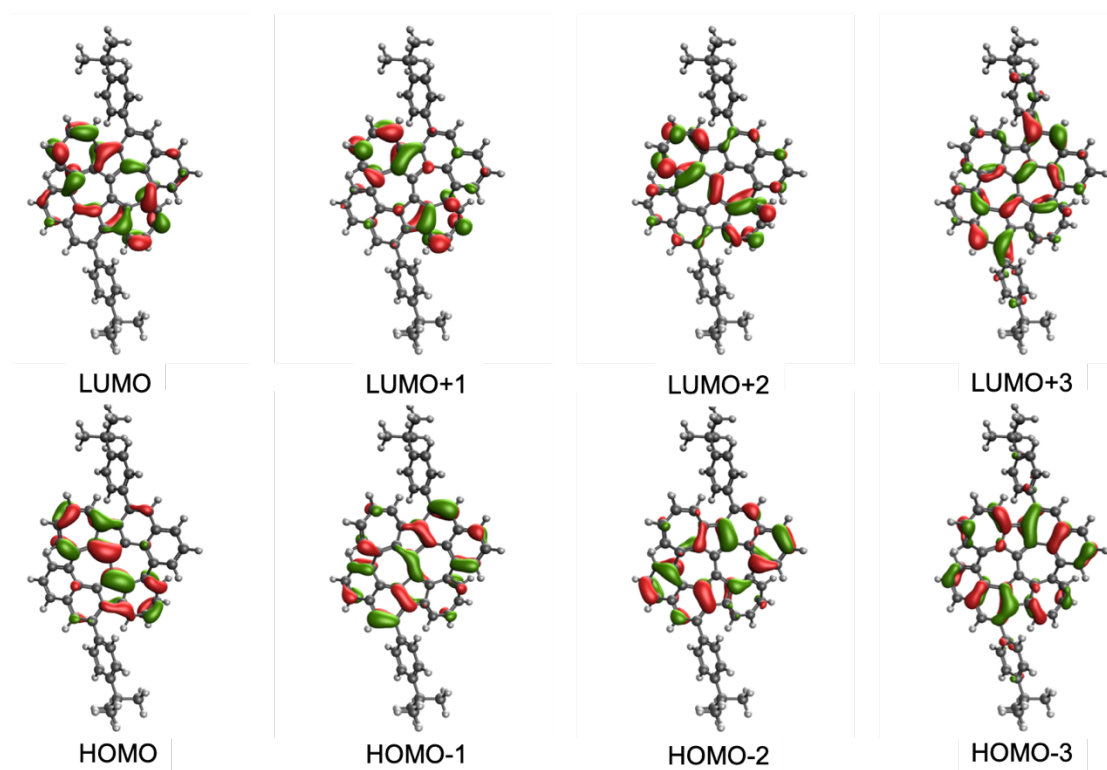

**Figure S10.** Frontier molecular orbitals of **1** computed at the rCAM-B3LYP/cc-pVTZ level.

## Vertical excitations

Excitation energies for the studied molecules have been obtained from ground-state geometries optimized at the CAM-B3LYP/cc-pVDZ level and with electronic transitions obtained with a larger basis set (cc-pVTZ) and with the rCAM-B3LYP functional, which has shown to minimize many-electron self-interaction error in largely conjugated systems [J. Chem. Phys. 126, 191109 (2007)].

**Table S5.** Vertical excitations ( $\Delta E$ ), oscillation strengths ( $f$ ), orbital composition and transition dipole moments ( $\mu$ ) of low-lying states of **biA1a** at the Franck-Condon region computed at the rCAM-B3LYP/cc-pVTZ level ( $H_0$ ,  $H_1$  and  $H_2$  present HOMO, HOMO+1, HOMO+2 orbitals, respectively.  $L_0$ ,  $L_1$ ,  $L_2$  and  $L_3$  are corresponding to LUMO, LUMO+1, LUMO+2, LUMO+3 orbitals, respectively).

| State          | $\Delta E$ , eV | $f$    | Composition                                                                                                              | Trans. Mom.                |
|----------------|-----------------|--------|--------------------------------------------------------------------------------------------------------------------------|----------------------------|
| S <sub>1</sub> | 1.213           | 0.0    | $H_0 \rightarrow L_0$                                                                                                    | 0.00 X ; 0.00 Y ; 0.00 Z   |
| S <sub>2</sub> | 2.327           | 0.0    | $H_1 \rightarrow L_1$                                                                                                    | 0.00 X ; 0.00 Y ; 0.00 Z   |
| S <sub>3</sub> | 2.557           | 0.0265 | $H_0 \rightarrow L_2$ (59 %) ; $H_2 \rightarrow L_0$ (32 %)<br>$H_0 \rightarrow L_1$ (5 %)                               | -0.62 X ; -0.19 Y ; 0.00 Z |
| S <sub>4</sub> | 3.142           | 0.3554 | $H_0 \rightarrow L_1$ (77 %) ; $H_0 \rightarrow L_2$ (9 %)                                                               | -2.11 X ; -0.40 Y ; 0.00 Z |
| S <sub>5</sub> | 3.462           | 0.0237 | $H_1 \rightarrow L_1$ (39 %) ; $H_0 \rightarrow L_3$ (35 %)<br>$H_2 \rightarrow L_0$ (9 %) ; $H_0 \rightarrow L_1$ (6 %) | 0.50 X ; 0.18 Y ; 0.00 Z   |

**Table S6.** Vertical excitations ( $\Delta E$ ), oscillation strengths ( $f$ ), orbital composition and transition dipole moments ( $\mu$ ) of low-lying states of low-lying states of **biA1b** at the Franck-Condon region computed at the rCAM-B3LYP/cc-pVTZ level. ( $H_0$ ,  $H_1$ ,  $H_2$ ,  $H_3$  and  $H_4$  present HOMO, HOMO+1, HOMO+2, HOMO+3 and HOMO+4 orbitals, respectively.  $L_0$ ,  $L_1$ ,  $L_2$ ,  $L_3$  and  $L_4$  are corresponding to LUMO, LUMO+1, LUMO+2, LUMO+3, LUMO+4 orbitals, respectively.)

| State          | $\Delta E$ , eV | $f$    | Composition                                                                                                                                                                            | Trans. Mom.               |
|----------------|-----------------|--------|----------------------------------------------------------------------------------------------------------------------------------------------------------------------------------------|---------------------------|
| S <sub>1</sub> | 2.015           | 0.0393 | $H_0 \rightarrow L_0$ (86 %) ; $H_1 \rightarrow L_2$ (7 %)                                                                                                                             | 0.76 X ; -0.46 Y ; 0.00 Z |
| S <sub>2</sub> | 2.340           | 0.0003 | $H_1 \rightarrow L_0$ (84 %) ; $H_0 \rightarrow L_2$ (9 %)                                                                                                                             | 0.00 X ; 0.00 Y ; 0.07 Z  |
| S <sub>3</sub> | 3.398           | 0.2270 | $H_0 \rightarrow L_1$ (52 %) ; $H_2 \rightarrow L_0$ (51 %)<br>$H_1 \rightarrow L_3$ (10 %)                                                                                            | 1.45 X ; -0.79 Y ; 0.00 Z |
| S <sub>4</sub> | 3.486           | 0.0    | $H_1 \rightarrow L_1$ (61 %) ; $H_0 \rightarrow L_3$ (22 %)<br>$H_0 \rightarrow L_2$ (7 %)                                                                                             | 0.00 X ; 0.00 Y ; 0.02 Z  |
| S <sub>5</sub> | 3.884           | 0.1906 | $H_2 \rightarrow L_0$ (43 %) ; $H_0 \rightarrow L_4$ (16 %)<br>$H_1 \rightarrow L_2$ (11 %) ; $H_0 \rightarrow L_1$ (8 %)<br>$H_4 \rightarrow L_0$ (8 %) ; $H_0 \rightarrow L_3$ (4 %) | -1.41 X ; 0.10 Y ; 0.00 Z |

**Table S7.** Vertical excitations ( $\Delta E$ ), oscillation strengths ( $f$ ), orbital composition and transition dipole moments ( $\mu$ ) of low-lying states of low-lying states of **biA1c** at the Franck-Condon region computed at the rCAM-B3LYP/cc-pVTZ level. ( $H_0, H_1, H_2$  and  $H_3$  present HOMO, HOMO+1, HOMO+2, HOMO+3 orbitals, respectively.  $L_0, L_1, L_2$  and  $L_3$  are corresponding to LUMO, LUMO+1, LUMO+2, LUMO+3 orbitals, respectively.)

| State          | $\Delta E$ , eV | $f$    | Composition                                                                                                              | Trans. Mom.                |
|----------------|-----------------|--------|--------------------------------------------------------------------------------------------------------------------------|----------------------------|
| S <sub>1</sub> | 1.989           | 0.0002 | $H_0 \rightarrow L_0$ (85 %) ; $H_1 \rightarrow L_1$ (8 %)                                                               | 0.00 X ; 0.00 Y ; 0.07 Z   |
| S <sub>2</sub> | 2.268           | 0.0627 | $H_0 \rightarrow L_1$ (72 %) ; $H_1 \rightarrow L_0$ (19 %)                                                              | 01.06 X ; -0.01 Y ; 0.00 Z |
| S <sub>3</sub> | 3.120           | 0.1947 | $H_0 \rightarrow L_2$ (72 %) ; $H_3 \rightarrow L_0$ (7 %)                                                               | -0.89 X ; 1.32 Y ; 0.00 Z  |
| S <sub>4</sub> | 3.323           | 0.0053 | $H_2 \rightarrow L_0$ (48 %) ; $H_0 \rightarrow L_3$ (17 %)<br>$H_3 \rightarrow L_1$ (8 %) ; $H_1 \rightarrow L_2$ (8 %) | 0.00 X ; 0.00 Y ; 0.26 Z   |
| S <sub>5</sub> | 3.813           | 0.0430 | $H_0 \rightarrow L_3$ (52 %) ; $H_2 \rightarrow L_0$ (26 %)                                                              | 0.00 X ; 0.00 Y ; 0.68 Z   |

**Table S8.** Vertical excitations ( $\Delta E$ ), oscillation strengths ( $f$ ), orbital composition and transition dipole moments ( $\mu$ ) of low-lying states of low-lying states of **biA1d** at the Franck-Condon region computed at the rCAM-B3LYP/cc-pVTZ level. ( $H_0, H_1, H_2$  and  $H_3$  present HOMO, HOMO+1, HOMO+2, HOMO+3 orbitals, respectively.  $L_0, L_1, L_2$  and  $L_3$  are corresponding to LUMO, LUMO+1, LUMO+2, LUMO+3 orbitals, respectively.)

| State          | $\Delta E$ , eV | $f$    | Composition                                                                                                                                             | Trans. Mom.               |
|----------------|-----------------|--------|---------------------------------------------------------------------------------------------------------------------------------------------------------|---------------------------|
| S <sub>1</sub> | 1.963           | 0.0002 | $H_0 \rightarrow L_0$ (86 %) ; $H_1 \rightarrow L_2$ (6 %)                                                                                              | 0.00 X ; 0.00 Y ; 0.06 Z  |
| S <sub>2</sub> | 2.270           | 0.1069 | $H_0 \rightarrow L_1$ (51 %) ; $H_0 \rightarrow L_2$ (22 %)<br>$H_1 \rightarrow L_0$ (15 %)                                                             | 0.06 X ; 1.38 Y ; 0.00 Z  |
| S <sub>3</sub> | 2.881           | 0.2596 | $H_0 \rightarrow L_2$ (51 %) ; $H_0 \rightarrow L_1$ (29 %)                                                                                             | 1.56 X ; 1.12 Y ; 0.00 Z  |
| S <sub>4</sub> | 3.015           | 0.0157 | $H_2 \rightarrow L_0$ (29 %) ; $H_0 \rightarrow L_3$ (29 %)<br>$H_1 \rightarrow L_1$ (25 %)                                                             | 0.00 X ; 0.00 Y ; -0.46 Z |
| S <sub>5</sub> | 3.317           | 0.3456 | $H_2 \rightarrow L_1$ (39 %) ; $H_1 \rightarrow L_0$ (35 %)<br>$H_3 \rightarrow L_0$ (7 %) ; $H_0 \rightarrow L_1$ (5 %)<br>$H_1 \rightarrow L_3$ (5 %) | 2.06 X ; -0.01 Y ; 0.00 Z |

**Table S9.** Vertical excitations ( $\Delta E$ ), oscillation strengths ( $f$ ), orbital composition and transition dipole moments ( $\mu$ ) of low-lying states of low-lying states of **2** at the Franck-Condon region computed at the rCAM-B3LYP/cc-pVTZ level. ( $H_0$ , and  $H_1$  present HOMO, HOMO+1 orbitals, respectively.  $L_0$  and  $L_1$  are corresponding to LUMO, LUMO+1, LUMO+2, LUMO+3 orbitals, respectively.)

| State          | $\Delta E$ , eV | $f$    | Composition                                   | Trans. Mom.                 |
|----------------|-----------------|--------|-----------------------------------------------|-----------------------------|
| S <sub>1</sub> | 3.073           | 0.4422 | $H_0 \rightarrow L_0$                         | -0.87 X ; -2.26 Y ; -0.17 Z |
| S <sub>2</sub> | 3.661           | 0.0001 | $H_1 \rightarrow L_0$ ; $H_0 \rightarrow L_1$ | -0.03 X ; -0.01 Y ; -0.02 Z |

**Table S10.** Vertical  $S_1 \rightarrow S_0$  deexcitation, oscillation strengths ( $f$ ), orbital composition and transition dipole moments ( $\mu$ ) of **2** at the  $S_1$  optimized geometry- computed at the rCAM-B3LYP/cc-pVTZ level. ( $H_0$  and  $L_0$  present HOMO and LUMO orbitals.)

| State | $\Delta E$ , eV | $f$    | Composition           | Trans. Mom.                 |
|-------|-----------------|--------|-----------------------|-----------------------------|
| $S_1$ | 2.660           | 0.4552 | $H_0 \rightarrow L_0$ | -0.84 X ; -2.50 Y ; -0.17 Z |

**Table S11.** Vertical excitations, oscillation strengths ( $f$ ), orbital composition and transition dipole moments ( $\mu$ ) of low-lying states of **1** at the Franck-Condon region computed at the rCAM-B3LYP/cc-pVTZ level. ( $H_0, H_1, H_2, H_3$  and  $H_4$  present HOMO, HOMO+1, HOMO+2, HOMO+3, HOMO+4 orbitals, respectively.  $L_0, L_1, L_2, L_3, L_5$  and  $L_6$  are corresponding to LUMO, LUMO+1, LUMO+2, LUMO+3, LUMO+5, LUMO+6 orbitals, respectively.)

| State | $\Delta E$ , eV | $f$    | Composition                                                                                                                                                                           | Trans. Mom.                |
|-------|-----------------|--------|---------------------------------------------------------------------------------------------------------------------------------------------------------------------------------------|----------------------------|
| $S_1$ | 2.128           | 0.0008 | $H_0 \rightarrow L_0$ (84 %) ; $H_1 \rightarrow L_1$ (8 %)                                                                                                                            | 0.00 X ; 0.01 Y ; -0.12 Z  |
| $S_2$ | 2.373           | 0.0675 | $H_0 \rightarrow L_1$ (71 %) ; $H_1 \rightarrow L_0$ (19 %)                                                                                                                           | 0.33 X ; 1.03 Y ; 0.00 Z   |
| $S_3$ | 3.198           | 0.1753 | $H_0 \rightarrow L_2$ (69 %) ; $H_3 \rightarrow L_0$ (7 %)<br>$H_2 \rightarrow L_1$ (5 %)                                                                                             | -1.16 X ; 0.95 Y ; 0.00 Z  |
| $S_4$ | 3.363           | 0.0086 | $H_2 \rightarrow L_0$ (44 %) ; $H_0 \rightarrow L_3$ (17 %)<br>$H_1 \rightarrow L_2$ (9 %) ; $H_3 \rightarrow L_1$ (8 %)<br>$H_1 \rightarrow L_1$ (7 %)                               | 0.00 X ; 0.00 Y ; -0.32 Z  |
| $S_5$ | 3.843           | 0.0482 | $H_0 \rightarrow L_3$ (48 %) ; $H_2 \rightarrow L_0$ (28 %)                                                                                                                           | 0.01 X ; 0.01 Y ; -0.72 Z  |
| $S_6$ | 4.037           | 0.6792 | $H_1 \rightarrow L_0$ (26 %) ; $H_2 \rightarrow L_1$ (26 %)<br>$H_0 \rightarrow L_1$ (9 %) ; $H_0 \rightarrow L_4$ (8 %)<br>$H_3 \rightarrow L_0$ (5 %)                               | 2.19 X ; -1.43 Y ; -0.01 Z |
| $S_7$ | 4.111           | 0.1212 | $H_1 \rightarrow L_0$ (22 %) ; $H_2 \rightarrow L_1$ (13 %)<br>$H_3 \rightarrow L_0$ (12 %) ; $H_0 \rightarrow L_2$ (8 %)<br>$H_3 \rightarrow L_3$ (5 %)                              | 0.20 X ; 1.08 Y ; 0.00 Z   |
| $S_8$ | 4.214           | 0.3170 | $H_2 \rightarrow L_2$ (27 %) ; $H_2 \rightarrow L_1$ (17 %)<br>$H_1 \rightarrow L_0$ (8 %) ; $H_1 \rightarrow L_5$ (7 %)<br>$H_0 \rightarrow L_6$ (5 %)                               | -1.23 X ; -1.25 Y ; 0.00 Z |
| $S_9$ | 4.263           | 0.0157 | $H_1 \rightarrow L_1$ (33 %) ; $H_2 \rightarrow L_3$ (11 %)<br>$H_3 \rightarrow L_2$ (9 %) ; $H_1 \rightarrow L_2$ (7 %)<br>$H_0 \rightarrow L_5$ (6 %) ; $H_0 \rightarrow L_0$ (6 %) | -0.01 X ; 0.00 Y ; 0.39 Z  |

**Table S12.** Vertical  $S_1 \rightarrow S_0$  deexcitation, oscillation strengths ( $f$ ), orbital composition and transition dipole moments ( $\mu$ ) of **1** at the  $S_1$  optimized geometry computed at the rCAM-B3LYP/cc-pVTZ level. ( $H_0$  and  $L_0$  present HOMO and LUMO orbitals.)

| State | $\Delta E$ , eV | $f$    | Composition                                                | Trans. Mom.               |
|-------|-----------------|--------|------------------------------------------------------------|---------------------------|
| $S_1$ | 0.997           | 0.0000 | $H_0 \rightarrow L_0$ (91 %) ; $H_1 \rightarrow L_1$ (5 %) | 0.00 X ; 0.01 Y ; -0.04 Z |

**Table S13.** Vertical excitations, oscillation strengths ( $f$ ), orbital composition and transition dipole moments ( $\mu$ ) of **1** at the  $S_2$  optimized geometry computed at the rCAM-B3LYP/cc-pVTZ level. ( $H_0$  and  $H_1$  present HOMO and HOMO+1 orbitals, respectively.  $L_0$  and  $L_1$  are corresponding to LUMO and LUMO+1 orbitals, respectively.)

| State | $\Delta E$ , eV | $f$    | Composition                                                 | Trans. Mom.               |
|-------|-----------------|--------|-------------------------------------------------------------|---------------------------|
| $S_1$ | 1.199           | 0.0002 | $H_0 \rightarrow L_0$ (89 %) ; $H_1 \rightarrow L_1$ (7 %)  | 0.00 X ; 0.01 Y ; -0.08 Z |
| $S_2$ | 1.545           | 0.0202 | $H_0 \rightarrow L_1$ (78 %) ; $H_1 \rightarrow L_0$ (13 %) | 0.42 X ; 0.60 Y ; 0.00 Z  |

**Table S14.** Vertical  $S_n \rightarrow S_0$  deexcitation, oscillation strengths ( $f$ ), orbital composition and transition dipole moments ( $\mu$ ) of **1** at the  $S_3$  optimized geometry computed at the rCAM-B3LYP/cc-pVTZ level. ( $H_0$  and  $H_1$  present HOMO and HOMO+1 orbitals, respectively.  $L_0$ ,  $L_1$ ,  $L_2$  and  $L_4$  are corresponding to LUMO, LUMO+1, LUMO+2, LUMO+4 orbitals, respectively.)

| State | $\Delta E$ , eV | $f$    | Composition                                                                                 | Trans. Mom.                |
|-------|-----------------|--------|---------------------------------------------------------------------------------------------|----------------------------|
| $S_1$ | 1.483           | 0.0000 | $H_0 \rightarrow L_0$ (88 %)                                                                | 0.00 X ; 0.00 Y ; -0.02 Z  |
| $S_2$ | 1.917           | 0.0315 | $H_0 \rightarrow L_2$ (46 %) ; $H_0 \rightarrow L_1$ (29 %)<br>$H_1 \rightarrow L_0$ (18 %) | -0.51 X ; -0.64 Y ; 0.00 Z |
| $S_3$ | 2.668           | 0.2966 | $H_0 \rightarrow L_1$ (56 %) ; $H_0 \rightarrow L_2$ (25 %)                                 | 1.49 X ; -1.52 Y ; 0.00 Z  |

**Table S15.** Vertical excitations, oscillation strengths ( $f$ ), orbital composition and transition dipole moments ( $\mu$ ) of low-lying states of azulene at the Franck-Condon region computed at the rCAM-B3LYP/cc-pVTZ level. ( $H_0$  and  $H_1$  present HOMO and HOMO+1 orbitals, respectively.  $L_0$  and  $L_1$  are corresponding to LUMO and LUMO+1 orbitals, respectively.)

| State | $\Delta E$ , eV | $f$    | Composition                                   | Trans. Mom.               |
|-------|-----------------|--------|-----------------------------------------------|---------------------------|
| $S_1$ | 2.378           | 0.0076 | $H_0 \rightarrow L_0$                         | -0.36 X ; 0.00 Y ; 0.00 Z |
| $S_2$ | 3.806           | 0.0026 | $H_1 \rightarrow L_0$ ; $H_0 \rightarrow L_1$ | 0.00 X ; 0.00 Y ; -0.17 Z |

## Nucleus-independent chemical shift (NICS)

NICS values [J. Am. Chem. Soc. 118, 6317-6318 (1996)] for the studied molecules have been computed at the rCAM-B3LYP/cc-pVTZ level at the optimized ground-state geometries.

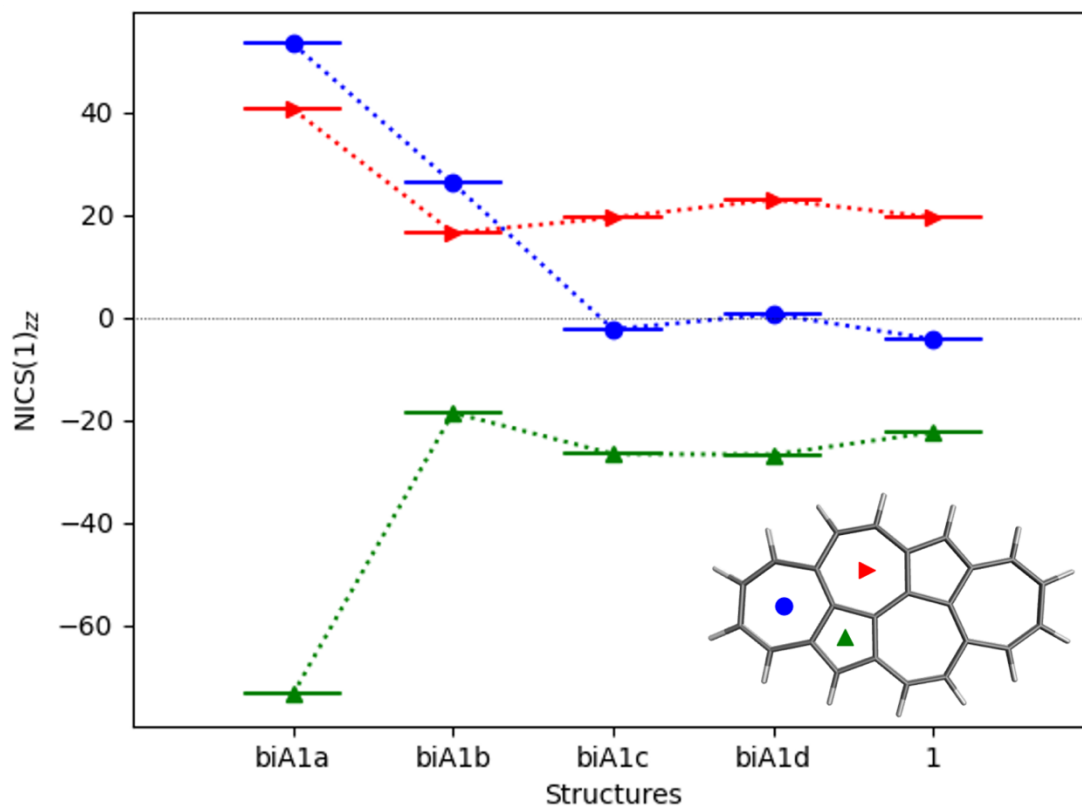

**Figure S11.** Ground state NICS<sub>zz</sub>(1) at the center of five- and seven-membered rings of compounds **biA1a-d** and **1**.

## 2. Transient absorption and fluorescence measurements

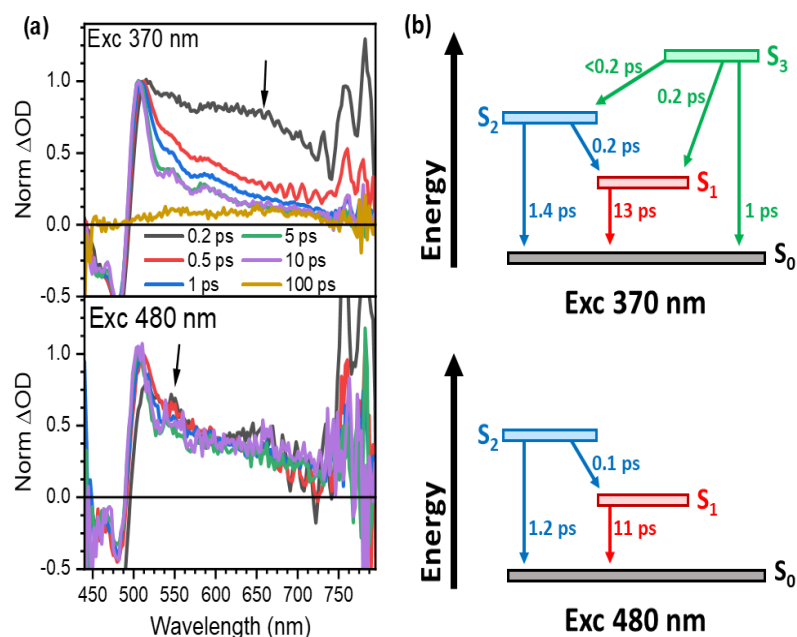

**Figure S12.** a) Normalised transient absorption spectra of a  $\text{CH}_2\text{Cl}_2$  solution of **1** recorded at several time delays upon excitation at 370 and 480 nm (top and bottom, respectively) at 0.25 mW. B) Jablonski diagram depicting the processes seen in the TAS experiment.

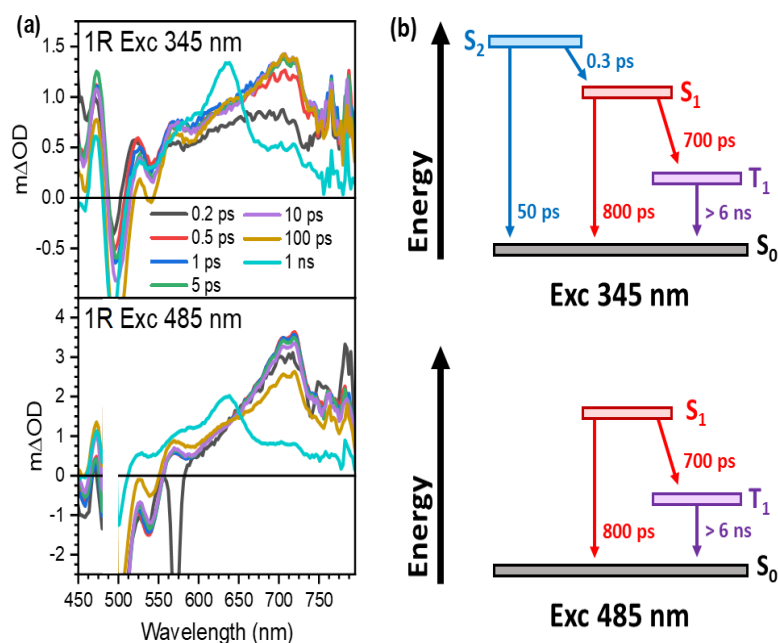

**Figure S13.** a) Transient absorption spectra of a  $\text{CH}_2\text{Cl}_2$  solution of **2** recorded at several time delays upon excitation at 345 and 485 nm (top and bottom, respectively) at 0.25 mW. b) Jablonski diagram depicting the processes seen in the TAS

Ground state and time resolved fluorescence characterization has been carried out in an Edinburgh fluorimeter FLS920. With a 400W Xenon lamp Xe900 and a R2658P. For nanosecond time resolved characterization pulsed laser EPL375 and an ultrafast F-G05 detector have been used.

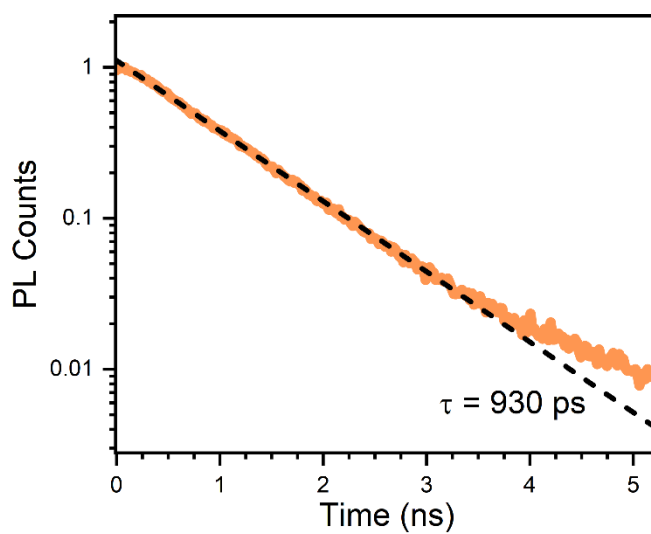

**Figure S14.** Fluorescence decay of a  $\text{CH}_2\text{Cl}_2$  solution of **2**. The dark dashed line indicates the monoexponential fitting for the decay with a lifetime of 930 ps.



### 3. Optimized coordinates

**Table S16.** Ground state optimized molecular geometry (in Angstroms) of molecule **1** obtained at the CAM-B3LYP/cc-pVDZ level.

|   |            |           |           |
|---|------------|-----------|-----------|
| C | -5.452832  | -0.909878 | 0.296671  |
| C | -6.465283  | -1.555435 | -0.419672 |
| H | -6.208088  | -2.392724 | -1.071314 |
| C | -7.787698  | -1.138224 | -0.321018 |
| H | -8.544388  | -1.667648 | -0.902720 |
| C | -8.162333  | -0.068824 | 0.501617  |
| C | -7.144326  | 0.566149  | 1.219417  |
| H | -7.376517  | 1.399356  | 1.881185  |
| C | -5.817350  | 0.157451  | 1.119103  |
| H | -5.049535  | 0.676208  | 1.695716  |
| C | -4.044449  | -1.391544 | 0.228551  |
| C | -3.754554  | -2.648671 | 0.690927  |
| H | -4.555916  | -3.265052 | 1.102353  |
| C | -2.434378  | -3.181381 | 0.688802  |
| C | -1.343471  | -2.415318 | 0.176508  |
| C | -1.627394  | -1.055953 | -0.159289 |
| C | -2.948442  | -0.586434 | -0.194317 |
| C | -9.634370  | 0.354321  | 0.588562  |
| C | -9.842650  | 1.532265  | 1.546206  |
| H | -10.909610 | 1.798685  | 1.577410  |
| H | -9.287383  | 2.426064  | 1.224610  |
| H | -9.531952  | 1.285648  | 2.572295  |
| C | -2.208624  | -4.474378 | 1.215504  |
| H | -3.054092  | -5.025007 | 1.632510  |
| C | -0.948442  | -5.011729 | 1.215313  |
| H | -0.758624  | -5.991996 | 1.655258  |
| C | 0.100973   | -4.311650 | 0.597086  |
| H | 1.085097   | -4.776982 | 0.551849  |
| C | -0.073715  | -3.056942 | 0.029152  |
| C | -0.720142  | 0.056452  | -0.407016 |
| C | 1.071089   | -2.531952 | -0.779330 |
| C | 1.488338   | -1.149820 | -0.684842 |
| C | 0.727200   | -0.028983 | -0.410187 |
| C | 1.635600   | 1.082115  | -0.160557 |
| C | 1.353197   | 2.440305  | 0.181136  |
| C | 0.083355   | 3.083050  | 0.039712  |
| C | -1.064778  | 2.560719  | -0.765701 |
| C | -1.482378  | 1.178502  | -0.673679 |
| C | -2.905633  | 0.770587  | -0.716536 |
| C | -10.130016 | 0.773195  | -0.806167 |

H -11.188492 1.074566 -0.761912  
H -10.045628 -0.048014 -1.532235  
H -9.548034 1.624062 -1.191778  
C -10.476546 -0.830460 1.092449  
H -11.538015 -0.544108 1.160668  
H -10.144510 -1.153738 2.090710  
H -10.406759 -1.696251 0.418186  
C 1.709029 -3.478639 -1.550698  
H 1.192719 -4.435782 -1.629842  
C 2.911501 -0.741593 -0.731315  
C 3.952694 -1.333415 -1.387099  
H 4.897649 -0.790784 -1.377519  
C 3.939330 -2.513550 -2.181832  
H 4.844047 -2.704442 -2.763376  
C 2.936456 -3.431792 -2.270132  
H 3.120317 -4.293191 -2.918194  
C 2.956270 0.612491 -0.201945  
C 4.054351 1.415213 0.220360  
C 3.766508 2.670957 0.687772  
H 4.569486 3.285828 1.098388  
C 2.446397 3.204154 0.692065  
C -0.088805 4.336343 0.611652  
H -1.072731 4.802479 0.570072  
C 2.222747 4.495449 1.223721  
H 3.069457 5.043861 1.641056  
C 0.962911 5.033646 1.229029  
H 0.775133 6.012643 1.672603  
C -1.704720 3.509510 -1.532921  
H -1.186647 4.465611 -1.613195  
C -3.950073 1.366266 -1.363592  
H -4.895085 0.823870 -1.351590  
C -3.940797 2.550110 -2.152561  
H -4.849183 2.745046 -2.727026  
C -2.936880 3.466861 -2.244466  
H -3.123882 4.330968 -2.887898  
C 5.461548 0.929880 0.282724  
C 6.474679 1.578396 -0.421461  
H 6.222462 2.426399 -1.061132  
C 7.801052 1.154155 -0.332821  
H 8.552410 1.692431 -0.909269  
C 8.167905 0.072791 0.469305  
C 7.142803 -0.566535 1.182800  
H 7.379218 -1.410732 1.832840  
C 5.821752 -0.153720 1.093255

|   |           |           |           |
|---|-----------|-----------|-----------|
| H | 5.051675  | -0.675810 | 1.663697  |
| C | 9.613434  | -0.424186 | 0.595154  |
| C | 10.582938 | 0.391655  | -0.266182 |
| H | 11.603213 | -0.003788 | -0.150865 |
| H | 10.601926 | 1.451037  | 0.029686  |
| H | 10.325012 | 0.337950  | -1.334301 |
| C | 9.690558  | -1.893153 | 0.144859  |
| H | 10.722076 | -2.267307 | 0.239486  |
| H | 9.382528  | -1.998354 | -0.906513 |
| H | 9.042279  | -2.541484 | 0.751760  |
| C | 10.063987 | -0.317210 | 2.062174  |
| H | 11.099480 | -0.676662 | 2.170532  |
| H | 9.429391  | -0.918403 | 2.729277  |
| H | 10.024335 | 0.725823  | 2.411040  |

**Table S17.** Molecular geometry (in Angstroms) of the minimum on the  $S_3$  state potential energy surface of molecule **1** optimized at the CAM-B3LYP/cc-pVDZ level.

|   |            |           |           |
|---|------------|-----------|-----------|
| C | -5.459860  | -0.893270 | 0.228920  |
| C | -6.465000  | -1.550550 | -0.486950 |
| H | -6.201200  | -2.395210 | -1.126420 |
| C | -7.789280  | -1.135580 | -0.403750 |
| H | -8.539960  | -1.673750 | -0.985380 |
| C | -8.173260  | -0.057490 | 0.402920  |
| C | -7.162290  | 0.589440  | 1.120170  |
| H | -7.401630  | 1.430030  | 1.769880  |
| C | -5.833730  | 0.183240  | 1.035370  |
| H | -5.072060  | 0.711240  | 1.611780  |
| C | -4.051060  | -1.376430 | 0.186410  |
| C | -3.777480  | -2.635350 | 0.664790  |
| H | -4.594330  | -3.246260 | 1.053240  |
| C | -2.463420  | -3.175490 | 0.708410  |
| C | -1.347290  | -2.413430 | 0.230740  |
| C | -1.613540  | -1.056370 | -0.116280 |
| C | -2.943840  | -0.582570 | -0.214770 |
| C | -9.646490  | 0.364320  | 0.470570  |
| C | -9.869370  | 1.537090  | 1.430980  |
| H | -10.937680 | 1.799230  | 1.453250  |
| H | -9.315200  | 2.434710  | 1.118490  |
| H | -9.567120  | 1.287740  | 2.459000  |
| C | -2.267160  | -4.465210 | 1.246820  |
| H | -3.129250  | -5.007850 | 1.638790  |
| C | -1.008150  | -5.014130 | 1.284200  |
| H | -0.839980  | -5.994210 | 1.733320  |

|   |            |           |           |
|---|------------|-----------|-----------|
| C | 0.061070   | -4.329620 | 0.695240  |
| H | 1.040420   | -4.805940 | 0.680340  |
| C | -0.078400  | -3.063730 | 0.123190  |
| C | -0.706690  | 0.051870  | -0.306920 |
| C | 1.095910   | -2.552030 | -0.632600 |
| C | 1.496660   | -1.191840 | -0.588110 |
| C | 0.712850   | -0.033420 | -0.306210 |
| C | 1.619480   | 1.074330  | -0.112870 |
| C | 1.353020   | 2.430900  | 0.235750  |
| C | 0.084590   | 3.081770  | 0.126810  |
| C | -1.088970  | 2.570920  | -0.630480 |
| C | -1.490250  | 1.210650  | -0.587240 |
| C | -2.889620  | 0.769490  | -0.725580 |
| C | -10.119850 | 0.790400  | -0.929610 |
| H | -11.179830 | 1.088510  | -0.901670 |
| H | -10.019870 | -0.025720 | -1.659720 |
| H | -9.533710  | 1.645420  | -1.299460 |
| C | -10.496860 | -0.822380 | 0.955430  |
| H | -11.558700 | -0.534680 | 1.009980  |
| H | -10.179470 | -1.151880 | 1.956460  |
| H | -10.419620 | -1.684720 | 0.277620  |
| C | 1.785700   | -3.558050 | -1.346630 |
| H | 1.248540   | -4.503020 | -1.416910 |
| C | 2.895760   | -0.749610 | -0.726970 |
| C | 3.954040   | -1.349700 | -1.381920 |
| H | 4.866400   | -0.757670 | -1.440850 |
| C | 3.990430   | -2.585230 | -2.054120 |
| H | 4.899980   | -2.806630 | -2.615650 |
| C | 3.005510   | -3.552430 | -2.033510 |
| H | 3.219820   | -4.468560 | -2.591260 |
| C | 2.950080   | 0.600920  | -0.212080 |
| C | 4.057140   | 1.394350  | 0.190980  |
| C | 3.782830   | 2.652050  | 0.672490  |
| H | 4.599420   | 3.262350  | 1.062340  |
| C | 2.468780   | 3.192120  | 0.715810  |
| C | -0.055230  | 4.347640  | 0.698920  |
| H | -1.034290  | 4.824520  | 0.682370  |
| C | 2.272070   | 4.481460  | 1.254970  |
| H | 3.133730   | 5.023490  | 1.648740  |
| C | 1.013300   | 5.031190  | 1.290150  |
| H | 0.844910   | 6.011220  | 1.739290  |
| C | -1.778060  | 3.577450  | -1.344090 |
| H | -1.240150  | 4.522020  | -1.414280 |
| C | -3.948960  | 1.371800  | -1.376490 |

|   |           |           |           |
|---|-----------|-----------|-----------|
| H | -4.862530 | 0.781290  | -1.432870 |
| C | -3.985160 | 2.607730  | -2.048070 |
| H | -4.895610 | 2.830530  | -2.607610 |
| C | -2.998750 | 3.573360  | -2.029610 |
| H | -3.212590 | 4.489690  | -2.587200 |
| C | 5.466500  | 0.913120  | 0.226760  |
| C | 6.466860  | 1.578140  | -0.480530 |
| H | 6.201330  | 2.432180  | -1.106680 |
| C | 7.796980  | 1.161890  | -0.413200 |
| H | 8.538060  | 1.711760  | -0.991810 |
| C | 8.180300  | 0.072880  | 0.370230  |
| C | 7.168270  | -0.582720 | 1.088010  |
| H | 7.418860  | -1.434380 | 1.722980  |
| C | 5.843680  | -0.177790 | 1.019930  |
| H | 5.083930  | -0.712480 | 1.592650  |
| C | 9.630550  | -0.415820 | 0.471330  |
| C | 10.583640 | 0.418410  | -0.390620 |
| H | 11.607180 | 0.025570  | -0.297470 |
| H | 10.602810 | 1.472840  | -0.077370 |
| H | 10.310110 | 0.381260  | -1.455560 |
| C | 9.711660  | -1.877830 | -0.000520 |
| H | 10.746250 | -2.247530 | 0.077220  |
| H | 9.393100  | -1.970790 | -1.050040 |
| H | 9.073690  | -2.538640 | 0.603950  |
| C | 10.098050 | -0.325370 | 1.933800  |
| H | 11.138020 | -0.676460 | 2.025560  |
| H | 9.476890  | -0.941190 | 2.600210  |
| H | 10.053430 | 0.712430  | 2.297390  |
